# Supplementary material
Source: PubMed Central journal article supplement (PMC9546767)
Supplement: mmc1.pdf [file mmc1.pdf]

## **SUPPLEMENTARY TABLES**

**Supplementary Table S1. Efficacy of the anti-SARS-Co-2 vaccination to prevent COVID-19 and death in patients over 60 years.** The incidence rate (number of events per 1,000 person-days) from infection and death from COVID-19 in unvaccinated patients (n=552) and in patients with complete vaccination (n=6,068) is shown. Patients with complete vaccination were considered as those who had greater than or equal to 14 days after receipt of the second dose. Efficacy of vaccination (estimated as 1 minus the hazard ratio adjusted for covariates, expressed as percentage) to reduce risk of infection or death with its 95% confidence interval are presented.

**Supplementary Table S2. Efficacy of the BNT162b2 and CoronaVac vaccines to prevent COVID-19 and death in patients over 60 years of age.** The incidence rate (number of events per 1,000 person-days) from infection and death from COVID-19 in unvaccinated patients (n=552) and patients with complete vaccination with BNT162b2 (n=1,638) or CoronaVac (n=4,430) is shown. Patients with complete vaccination were considered as those who had greater than or equal to 14 days after receipt of the second dose. Efficacy of vaccination (estimated as 1 minus the hazard ratio adjusted for covariates, expressed as percentage) to reduce risk of infection or death with its 95% confidence interval are presented.

**Supplementary Table S3. Efficacy of the anti-SARS-Co-2 vaccination to prevent COVID-19 and death in patients with diabetes.** The incidence rate

(number of events per 1,000 person-days) from infection and death from COVID-19 in unvaccinated patients (n=238) and in patients with complete vaccination (n=1,947) is shown. Patients with complete vaccination were considered as those who had greater than or equal to 14 days after receipt of the second dose. Efficacy of vaccination (estimated as 1 minus the hazard ratio adjusted for covariates, expressed as percentage) to reduce risk of infection or death with its 95% confidence interval are presented.

**Supplementary Table S4. Efficacy of the BNT162b2 and CoronaVac vaccines to prevent COVID-19 and death in patients with diabetes.** The incidence rate (number of events per 1,000 person-days) from infection and death from COVID-19 in unvaccinated patients (n=238) and patients with complete vaccination with BNT162b2 (n=1,500) or CoronaVac (n=447) is shown. Patients with complete vaccination were considered as those who had greater than or equal to 14 days after receipt of the second dose. Efficacy of vaccination (estimated as 1 minus the hazard ratio adjusted for covariates, expressed as percentage) to reduce risk of infection or death with its 95% confidence interval are presented.

**Supplementary Table S1.**

| Outcome and immunization status | Patients of 60 years or older | Patients with COVID-19 of 60 years or older |                                                       | Vaccine efficacy               |                                     |                        |
|---------------------------------|-------------------------------|---------------------------------------------|-------------------------------------------------------|--------------------------------|-------------------------------------|------------------------|
|                                 | Number of person-days         | Number of persons                           | Incidence rate (number of events / 1,000 person-days) | Age- and sex-adjusted analysis | Analysis adjusted for all variables |                        |
| <b>COVID-19 diagnosis</b>       |                               |                                             |                                                       |                                |                                     |                        |
|                                 | Unvaccinated                  | 107,756                                     | 89                                                    | 0.826                          | -                                   | -                      |
|                                 | Complete vaccination          | 1,250,425                                   | 600                                                   | 0.480                          | 23.4%<br>(14.4%-31.5%)              | 22.9%<br>(13,8%-31,1%) |
| <b>Deaths</b>                   |                               |                                             |                                                       |                                |                                     |                        |
|                                 | Unvaccinated                  | 114,763                                     | 39                                                    | 0.340                          | -                                   | -                      |
|                                 | Complete vaccination          | 1,329,418                                   | 46                                                    | 0.035                          | 68.3%<br>(60.8%-74.4%)              | 68.8%<br>(61.3%-74.8%) |

**Supplementary Table S2.**

| Outcome and immunization status          | Patients of 60 years or older | Patients with COVID-19 of 60 years or older |                                                       | Vaccine efficacy               |                                     |  |
|------------------------------------------|-------------------------------|---------------------------------------------|-------------------------------------------------------|--------------------------------|-------------------------------------|--|
|                                          | Number of person-days         | Number of persons                           | Incidence rate (number of events / 1.000 person-days) | Age- and sex-adjusted analysis | Analysis adjusted for all variables |  |
| <b>COVID-19 diagnosis</b>                |                               |                                             |                                                       |                                |                                     |  |
| Unvaccinated                             | 107,756                       | 89                                          | 0.826                                                 | -                              | -                                   |  |
| Complete vaccination (BNT162b2 vaccine)  | 179,976                       | 75                                          | 0.417                                                 | 47.4%<br>(27.2%-61.9%)         | 47.9%<br>(27.9%-62.4%)              |  |
| Complete vaccination (CoronaVac vaccine) | 1,070,449                     | 525                                         | 0.490                                                 | 22.1%<br>(12.8%-30.4%)         | 21.6%<br>(12.2%-30.0%)              |  |
| <b>Deaths</b>                            |                               |                                             |                                                       |                                |                                     |  |
| Unvaccinated                             | 114,763                       | 39                                          | 0.340                                                 | -                              | -                                   |  |
| Complete vaccination (BNT162b2 vaccine)  | 191,248                       | 2                                           | 0.010                                                 | 96.5%<br>(85.2%-99.2%)         | 96.7%<br>(86.0%-99.3%)              |  |
| Complete vaccination (CoronaVac vaccine) | 1,138,170                     | 44                                          | 0.039                                                 | 66.6%<br>(58.5%-73.1%)         | 66.9%<br>(58.9%-73.4%)              |  |

**Supplementary Table S3.**

| Outcome and immunization status | Patients with diabetes | Patients with COVID-19 and diabetes |                                                       | Vaccine efficacy               |                                     |  |
|---------------------------------|------------------------|-------------------------------------|-------------------------------------------------------|--------------------------------|-------------------------------------|--|
|                                 | Number of person-days  | Number of persons                   | Incidence rate (number of events / 1,000 person-days) | Age- and sex-adjusted analysis | Analysis adjusted for all variables |  |
| <b>COVID-19 diagnosis</b>       |                        |                                     |                                                       |                                |                                     |  |
| Unvaccinated                    | 40,242                 | 59                                  | 1.466                                                 | -                              | -                                   |  |
| Complete vaccination            | 361,925                | 314                                 | 0.868                                                 | 21.2%<br>(9.4%-31.5%)          | 23.8%<br>(12.4%-33.8%)              |  |
| <b>Deaths</b>                   |                        |                                     |                                                       |                                |                                     |  |
| Unvaccinated                    | 46,419                 | 21                                  | 0.452                                                 | -                              | -                                   |  |
| Complete vaccination            | 406,390                | 23                                  | 0.057                                                 | 65.1%<br>(53.0%-74.1%)         | 68.8%<br>(57.7%-77.1%)              |  |

**Supplementary Table S4.**

| Outcome and immunization status          | Patients with diabetes | Patients with COVID-19 and diabetes |                                                       | Vaccine efficacy               |                                     |  |
|------------------------------------------|------------------------|-------------------------------------|-------------------------------------------------------|--------------------------------|-------------------------------------|--|
|                                          | Number of person-days  | Number of persons                   | Incidence rate (number of events / 1.000 person-days) | Age- and sex-adjusted analysis | Analysis adjusted for all variables |  |
| <b>COVID-19 diagnosis</b>                |                        |                                     |                                                       |                                |                                     |  |
| Unvaccinated                             | 40,242                 | 59                                  | 1.466                                                 | -                              | -                                   |  |
| Complete vaccination (BNT162b2 vaccine)  | 82,314                 | 69                                  | 0.838                                                 | 43.4%<br>(19.4%-60.3%)         | 47.5%<br>(24.7%-63.4%)              |  |
| Complete vaccination (CoronaVac vaccine) | 279,611                | 245                                 | 0.876                                                 | 19.2%<br>(6.7%-30.1%)          | 22.3%<br>(10.2%-32.8%)              |  |
| <b>Deaths</b>                            |                        |                                     |                                                       |                                |                                     |  |
| Unvaccinated                             | 46,419                 | 21                                  | 0.452                                                 | -                              | -                                   |  |
| Complete vaccination (BNT162b2 vaccine)  | 93,740                 | 1                                   | 0.011                                                 | 97.5%<br>(80.7%-99.7%)         | 98.9%<br>(88.6%-99.9%)              |  |
| Complete vaccination (CoronaVac vaccine) | 312,650                | 22                                  | 0.070                                                 | 60.9%<br>(47.0%-71.2%)         | 64.8%<br>(51.8%-74.2%)              |  |
